# Supplementary material for: USP19 deubiquitinase inactivation regulates α-synuclein ubiquitination and inhibits accumulation of Lewy body-like aggregates in mice
Source: PubMed Central journal article supplement (PMC10684503; doi:10.1038/s41531-023-00601-1), 2023-11-28

**Supplementary Table 1 – List of Antibodies and Oligonucleotides**

| <b>REAGENT</b>                                   | <b>SOURCE</b>     | <b>IDENTIFIER</b>         |
|--------------------------------------------------|-------------------|---------------------------|
| <b>Antibodies</b>                                |                   |                           |
| Mouse anti-a-Synuclein (Syn-1)                   | BD Bioscience     | 610787                    |
| Mouse anti-alpha-synuclein (4D6)                 | Abcam             | ab1903                    |
| Mouse anti-ubiquitin (FK2)                       | Millipore         | ST1200                    |
| Rabbit anti-ubiquitin                            | Sigma             | U5379                     |
| Rabbit anti-pS129-a-Synuclein (EP1536Y)          | Abcam             | ab51253                   |
| Mouse anti-pS129-a-Synuclein (81A)               | Abcam             | ab184674                  |
| Rabbit anti-phospho-a-Synuclein (Ser129) (D1R1R) | Cell Signaling    | 23706                     |
| Guinea pig anti-MAP2                             | Synaptic Systems  | 188004                    |
| Rabbit anti-Tyrosine Hydroxylase (TH)            | Millipore         | AB152                     |
| Rabbit anti-NeuN                                 | Abcam             | ab177487                  |
| Rabbit anti-NeuN                                 | Millipore         | MAB377                    |
| Mouse anti-Iba-1                                 | Wako              | 019-19741                 |
| Rabbit anti-Iba-1                                | Wako              | 016-20001                 |
| Rabbit anti-GFAP                                 | Abcam             | ab7260                    |
| Mouse anti-GFAP                                  | Santa Cruz        | sc-33673                  |
| Mouse anti-GFAP                                  | Millipore         | MAB360                    |
| Mouse anti-pTau (Ser202, Thr205) AT8             | Thermo Scientific | MN1020                    |
| Mouse anti-Tau (TAU-5)                           | Thermo Scientific | AHB0042                   |
| Rabbit anti-USP19                                | Abcam             | ab167059                  |
| Mouse anti-SNAP25                                | Synaptic Systems  | 111011                    |
| Mouse anti-Synaptotagmin-1                       | Synaptic Systems  | 105011                    |
| Alexa 488 goat anti-mouse                        | Invitrogen        | A11029                    |
| Alexa 568 goat anti-mouse                        | Invitrogen        | A11004                    |
| Alexa 647 donkey anti-mouse                      | Invitrogen        | A31571                    |
| Alexa 488 goat anti-rabbit                       | Invitrogen        | A11008                    |
| Alexa 568 goat anti-rabbit                       | Invitrogen        | A11011                    |
| Alexa 647 donkey anti-rabbit                     | Invitrogen        | A31573                    |
| Alexa 555 goat anti-guinea pig                   | Invitrogen        | A21435                    |
| Opal 520                                         | Akoya Biosciences | SKU FP1487001KT           |
| Opal 570                                         | Akoya Biosciences | SKU FP1488001KT           |
| Opal 690                                         | Akoya Biosciences | SKU FP1497001KT           |
| HRP-conjugated anti-mouse                        | Biorad            | 1705047                   |
| HRP-conjugated anti-rabbit                       | Biorad            | 1705046                   |
| <b>Oligonucleotides</b>                          |                   |                           |
| RNAscope USP19-common probe                      | ACDbio            | Mm-Usp19                  |
| RNAscope USP19-ER probe                          | ACDbio            | Mm-Usp19-O1-C2            |
| RNAscope USP19-cyt probe                         | ACDbio            | Mm-Usp19-O2-C3            |
| Geo cassette Forward                             | IDT               | CAGCAACCAGTAACCTCTG       |
| Geo cassette Reverse                             | IDT               | GACAGTATCGGCCTCAGGAAGATCG |
| USP19 Forward                                    | IDT               | GTAAGATGGAGATGCTAGGAG     |
| USP19 Reverse                                    | IDT               | GCTTACAATCACCTCATCTGC     |

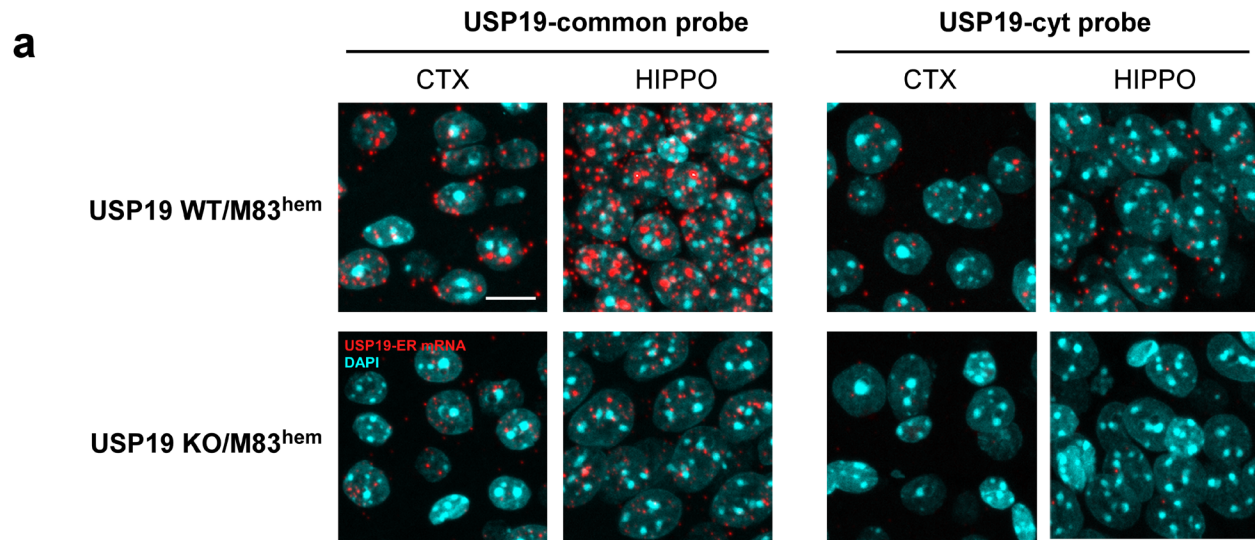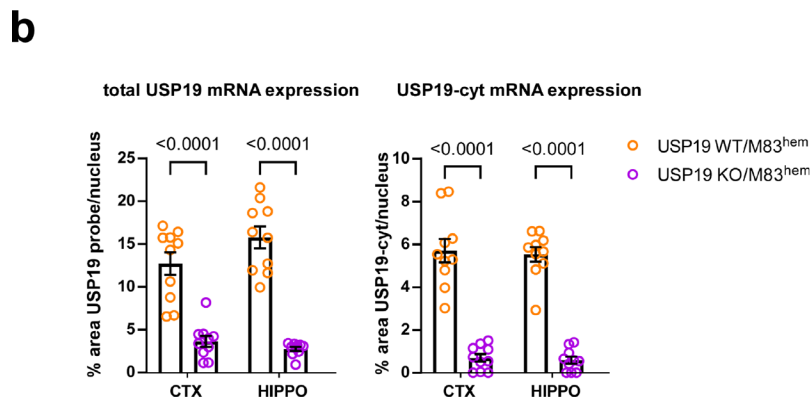

**Supplementary Fig. 1: USP19 cytoplasmic isoform is expressed in the brain.** **a.** RNAScope in-situ hybridization on FFPE brain sections to detect the presence (red signal) of both ER and cytoplasmic USP19 (using common probes) and cytoplasmic only USP19 isoform in USP19 WT/M83<sup>hem</sup> and USP19 KO/M83<sup>hem</sup> animals. Shown are representative images of CTX and HIPPO. DAPI was used to label nuclei. Scale bar= 10 $\mu$ m. **b.** Quantification of RNAScope USP19-common and -cyt signals presented as percent area of red pixels in 10 randomly selected nuclei in CTX and HIPPO. Data are mean  $\pm$  s.e.m. Unpaired t-test was used for statistical analysis. P-values are indicated.

**a**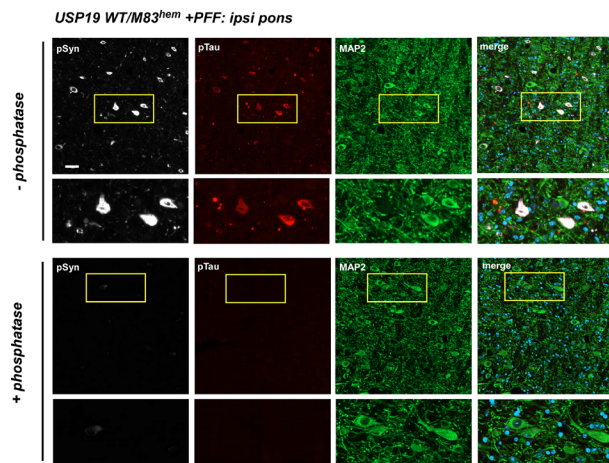**b**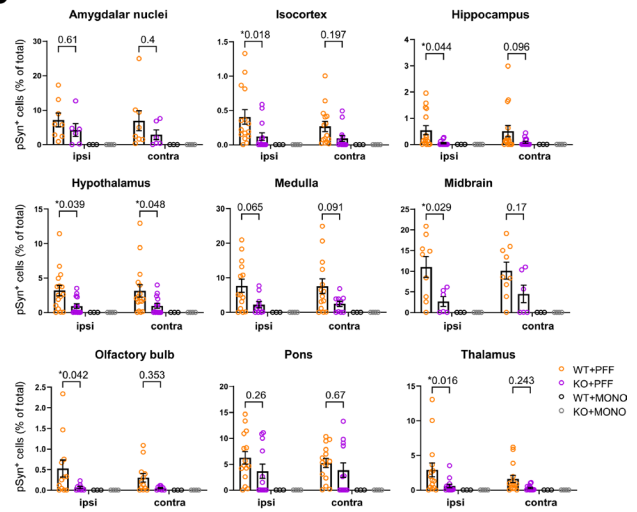**c**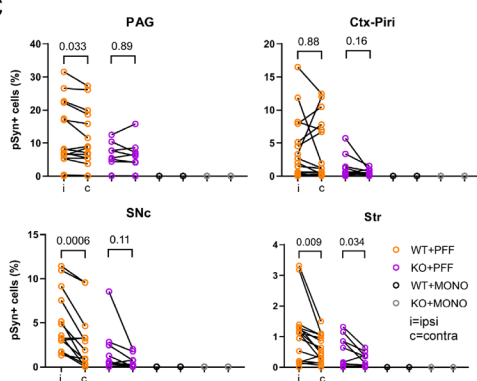**d**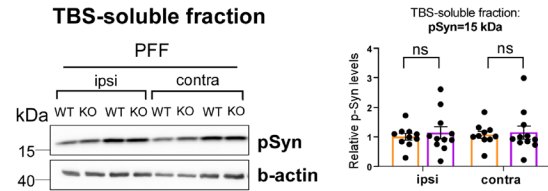**e**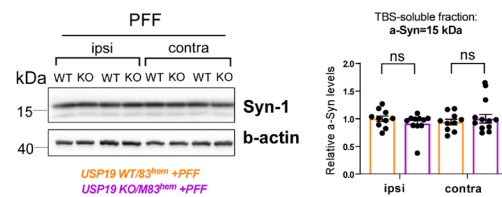**f**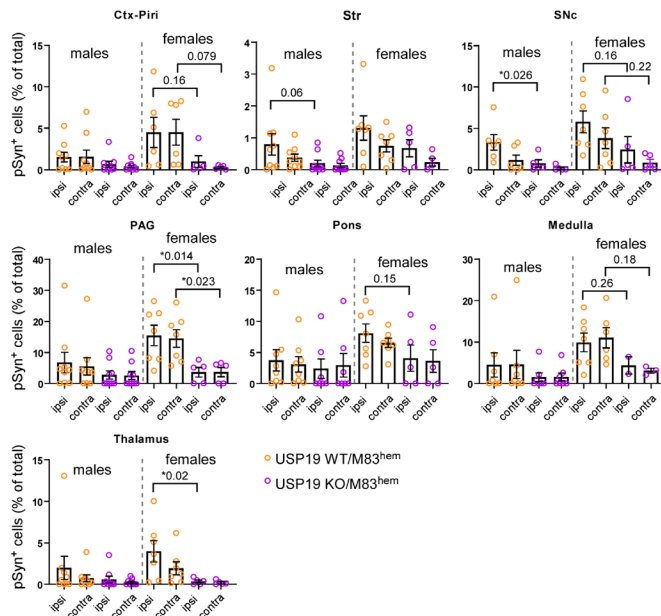**g**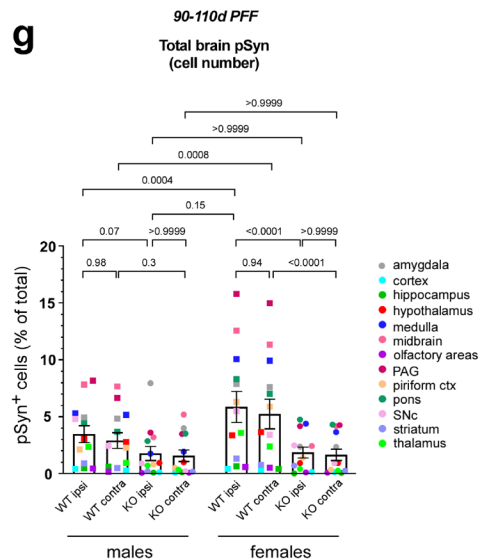

**Supplementary Fig. 2: Levels of total soluble pSyn and total soluble  $\alpha$ -syn in USP19-WT and -KO PD-like brains.** **a.** Immunofluorescence images of pSyn (A) and pTau (B), and neuronal (MAP2) and DAPI staining of brain sections (shown is ipsi pons) treated or not with phosphatase to test the specificity of pSyn and pTau staining. Scale bar= 50 $\mu$ m. **b.** Quantification of pS129-Syn<sup>+</sup> cells using QuPath analysis in indicated brain regions. Each data point represents a mean of 4 brain sections per animal. n  $\geq$  10 (PFF-injected) and n=3-4 ( $\alpha$ -syn monomers-injected) biologically independent animals. Data are mean  $\pm$  s.e.m. Two-way ANOVA was used for statistical analysis followed by Sidak multiple comparisons test. **c.** Paired analysis of pS129-Syn<sup>+</sup> cells in indicated brain regions showing ipsi- to contralateral region spreading of pSyn pathology. Each data point represents a mean of 4 brain sections per animal. n  $\geq$  10 (PFF-injected) and n=3-4 ( $\alpha$ -syn monomers-injected) biologically independent animals. Data are mean  $\pm$  s.e.m. Paired t-test was used for statistical analysis. **d.-e.** Representative immunoblots of pS129-Syn and total  $\alpha$ -syn (Syn-1) of TBS-soluble whole hemisphere fractions. Beta-actin was used as a loading control. Data are mean  $\pm$  s.e.m., n  $\geq$  10 biologically independent animals. **f.** Quantification of pS129-Syn<sup>+</sup> cells using QuPath analysis in indicated brain regions in male and female mice. Each data point represents a mean of 4 brain sections per animal. n  $\geq$  4 PFF-injected biologically independent male or female mice, except for medulla region (n $\geq$ 2). Data are mean  $\pm$  s.e.m. Two-way ANOVA was used for statistical analyses followed by Sidak multiple comparisons test. P-values are indicated. **g.** Overall quantification of total brain pS129-Syn represented as pSyn<sup>+</sup> cells (% of total) using IHC in A with additional brain regions at 90-110 dpi. Each point is a mean of means per brain region (each brain region is color-coded). Data are mean  $\pm$  s.e.m. Two-way ANOVA was used for statistical analysis followed by Tukey's multiple comparisons test. P-values are indicated.

**a**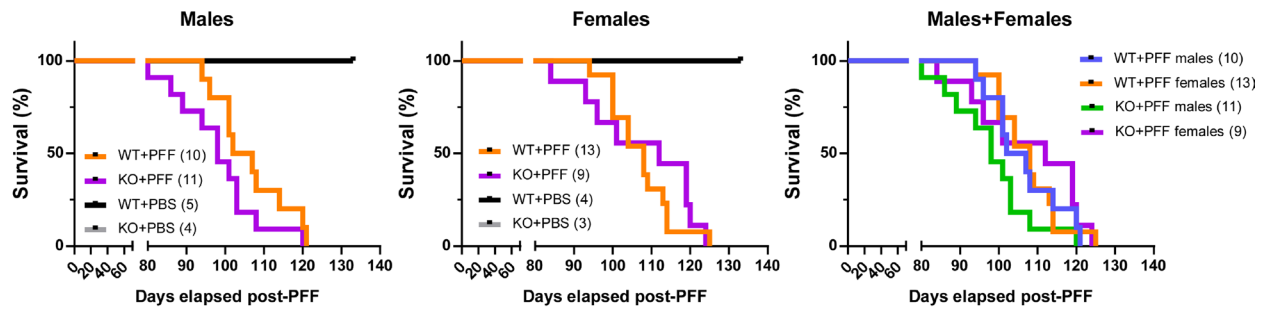**b**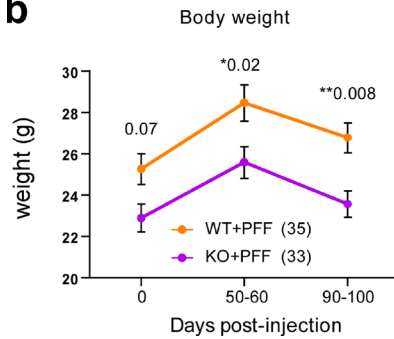

### Supplementary Fig. 3: Survival of USP19 WT and KO PD-like mice

**a.** Kaplan-Meier survival analysis of USP19 WT/M83<sup>hem</sup> and KO/M83<sup>hem</sup> males and females injected with PFF or PBS.  $n \geq 3$  biologically independent animals. Statistical analysis for survival curves was performed by long-rank (Mantel-Cox) test. **b.** Effects of USP19 depletion on body weight in PD-like mice. KO animals have significantly reduced body weight compared to WT which may lead to a faster deterioration upon the manifestation of PD-like symptoms. Data are mean  $\pm$  s.e.m. Two-way ANOVA was used for statistical analysis followed by Sidak's multiple comparisons test. P-values are indicated.

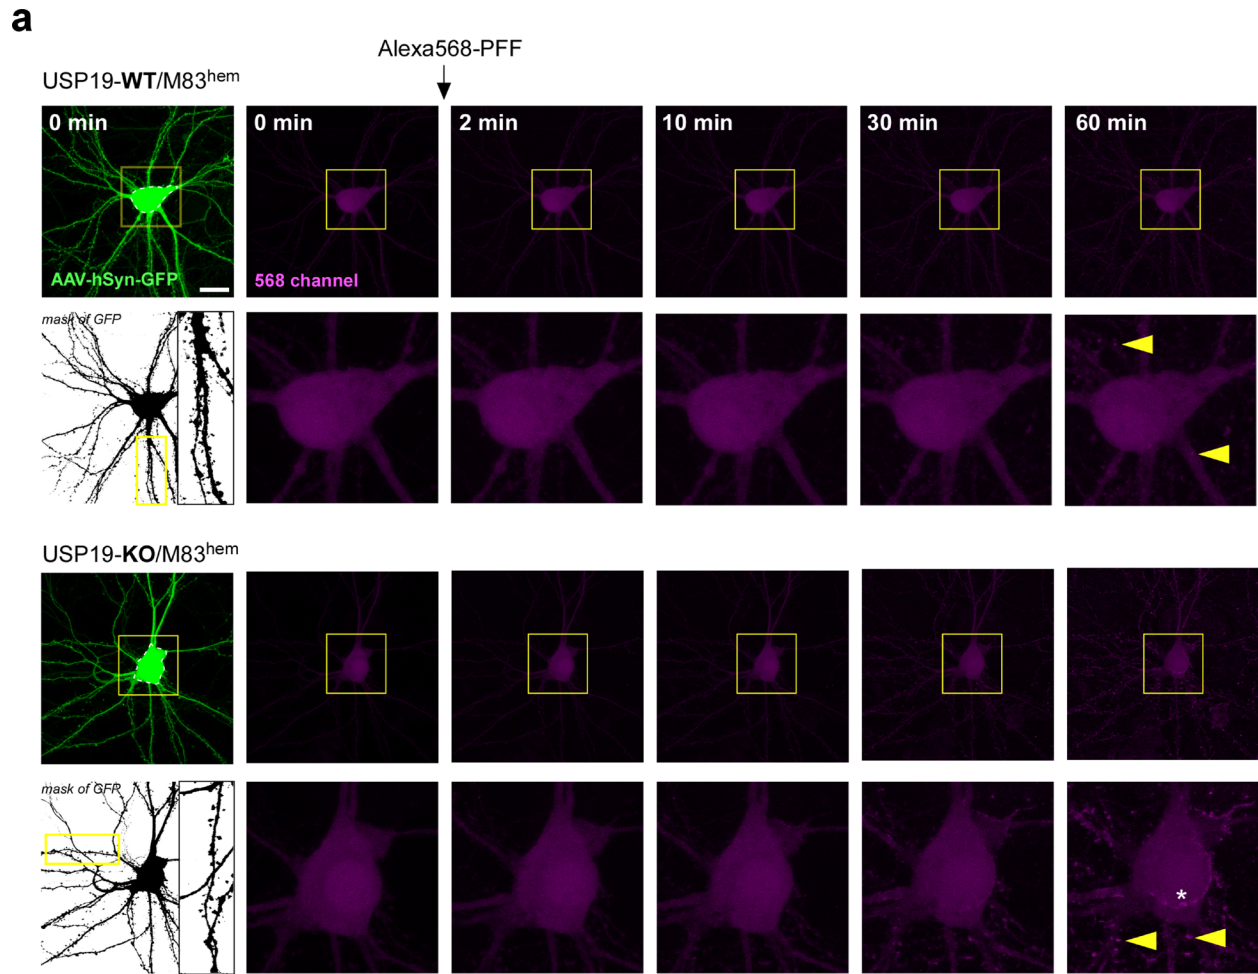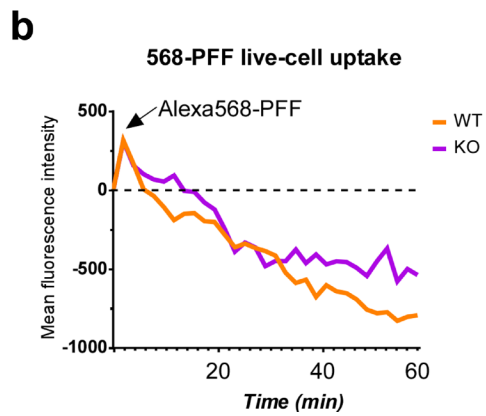

**Supplementary Fig. 4: Live-cell PFF uptake in USP19 WT and KO neurons.**

**a.** Micrographs of live-cell imaging of Alexa568-PFF (magenta) uptake in WT and KO neurons. GFP-expressing mature (20 DiV) spiny neurons (B/W mask inserted for better visualization) were treated with 1  $\mu$ g/ml Alexa568-PFF and mean fluorescence intensity was measured in the cell body as measure of

uptake over time. Scale bar= 20 $\mu$ m. **b.** Quantification shows a decrease in mean fluorescence intensity in both WT and KO neurons over time. This is likely due to bleaching of the background fluorescence suggesting that 568-PFF uptake had not occurred under these conditions. Of note, asterisk shows that PFF are recruited to the membranes along the whole neuron (dendrites, spines and cell body). This was observed on similar time scales between WT and KO neurons (data not shown).

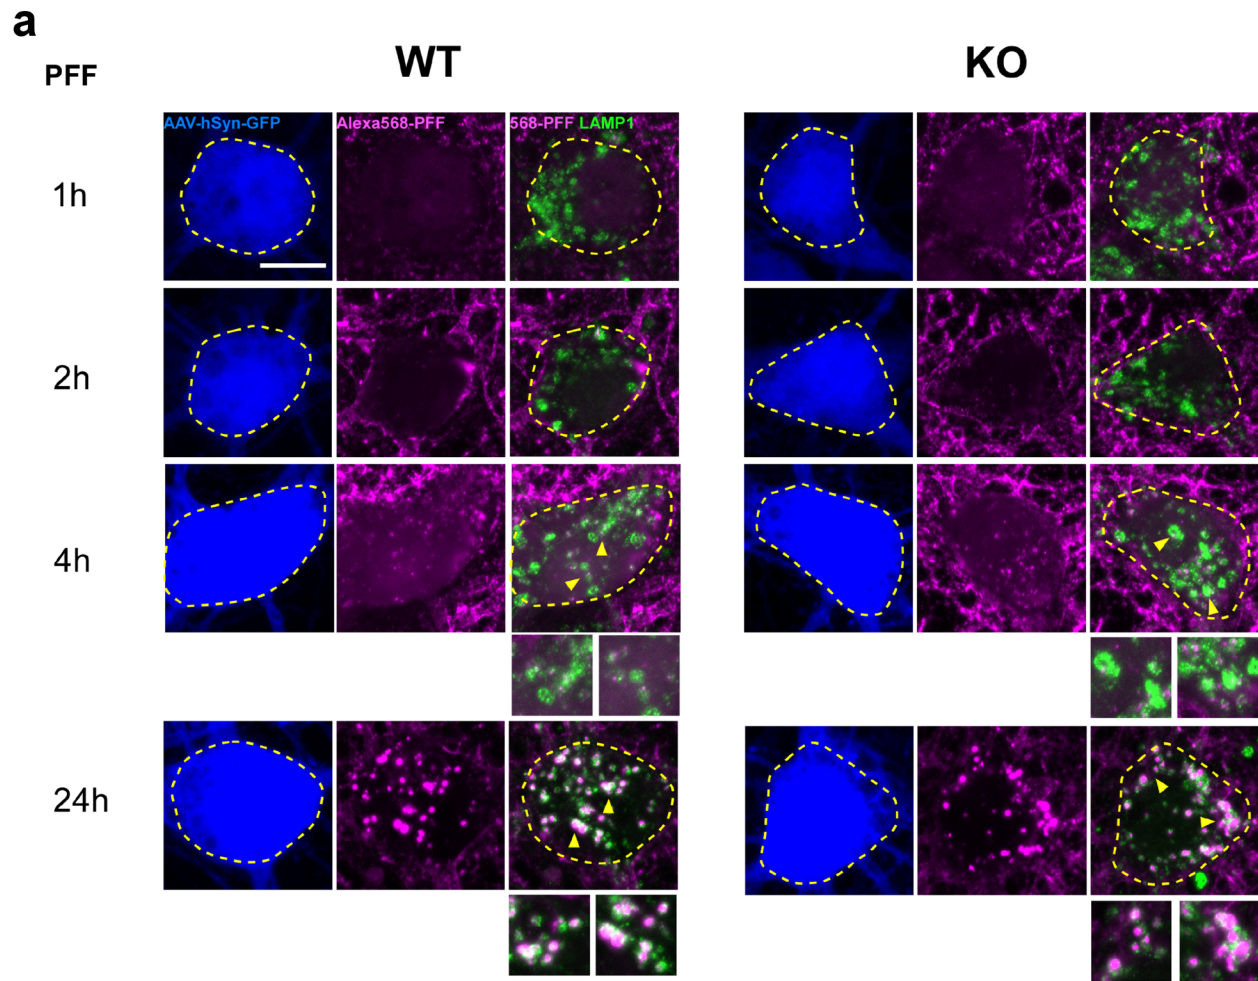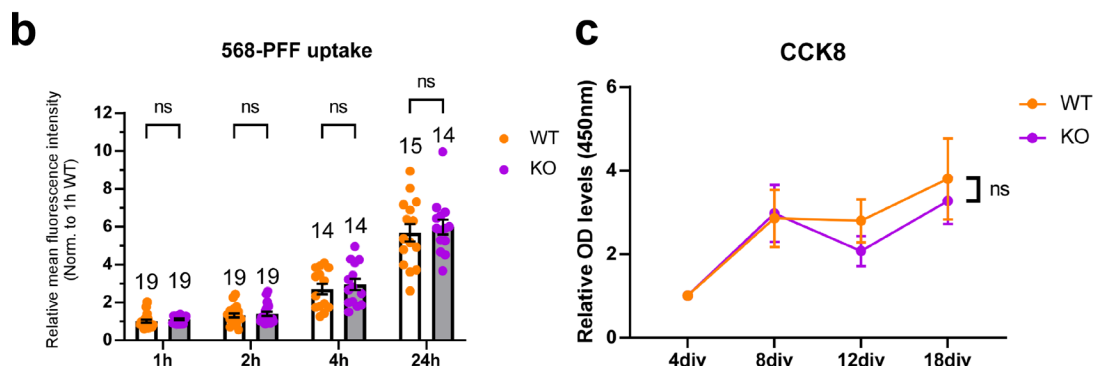

**Supplementary Fig. 5: PFF uptake is indifferent between WT and KO neurons.**

**a.** Micrographs show a time course experiment of Alexa568-PFF (magenta) uptake in primary WT and KO neurons transduced to express GFP (blue) and immunolabeled for LAMP1 (green, lysosomal marker). Scale bar= 10  $\mu$ m. **b.** Quantification shows mean red fluorescence intensity measured in the cell body over 24h post-PFF treatment. n= 3 independent cultures. Numbers above bars mark total number of



neurons analyzed (>4 neurons per culture). Data are mean  $\pm$ s.e.m. Overall, very little uptake, if any, takes place in the first 2h post-PFF treatment. PFF puncta are clearly seen in colocalization with LAMP1 at the 4h time-point (higher magnification insets) as well as an increased diffused red signal in the cell body cytoplasm. At 24h, much of the membrane-recruited PFF (can be seen as strong signal around the cell body at previous timepoints) are now internalized and trafficked to lysosomes. **c.** Cell counting kit (CCK8) was used to assess differences in cell viability between USP19 WT and KO neurons during maturation in culture. Four time points (4, 8, 12 and 18 DiV) were assessed. n=3 independent primary cultures, each with three technical replicates (wells) per timepoint. Data are mean  $\pm$ s.e.m. Two-way ANOVA followed by Tukey's multiple comparison test was used for statistical analysis.

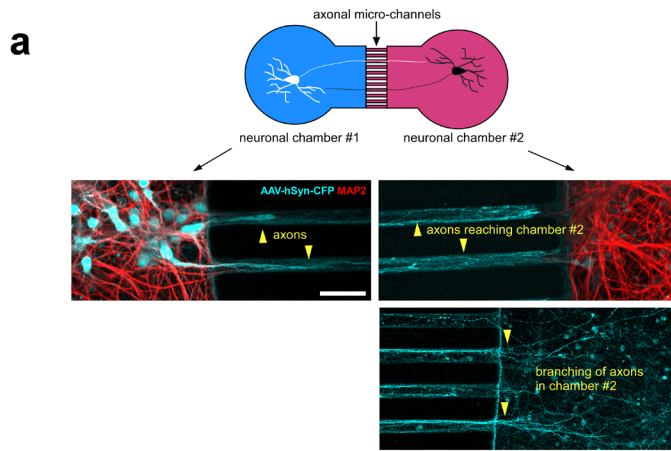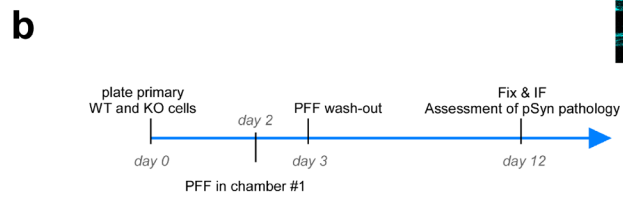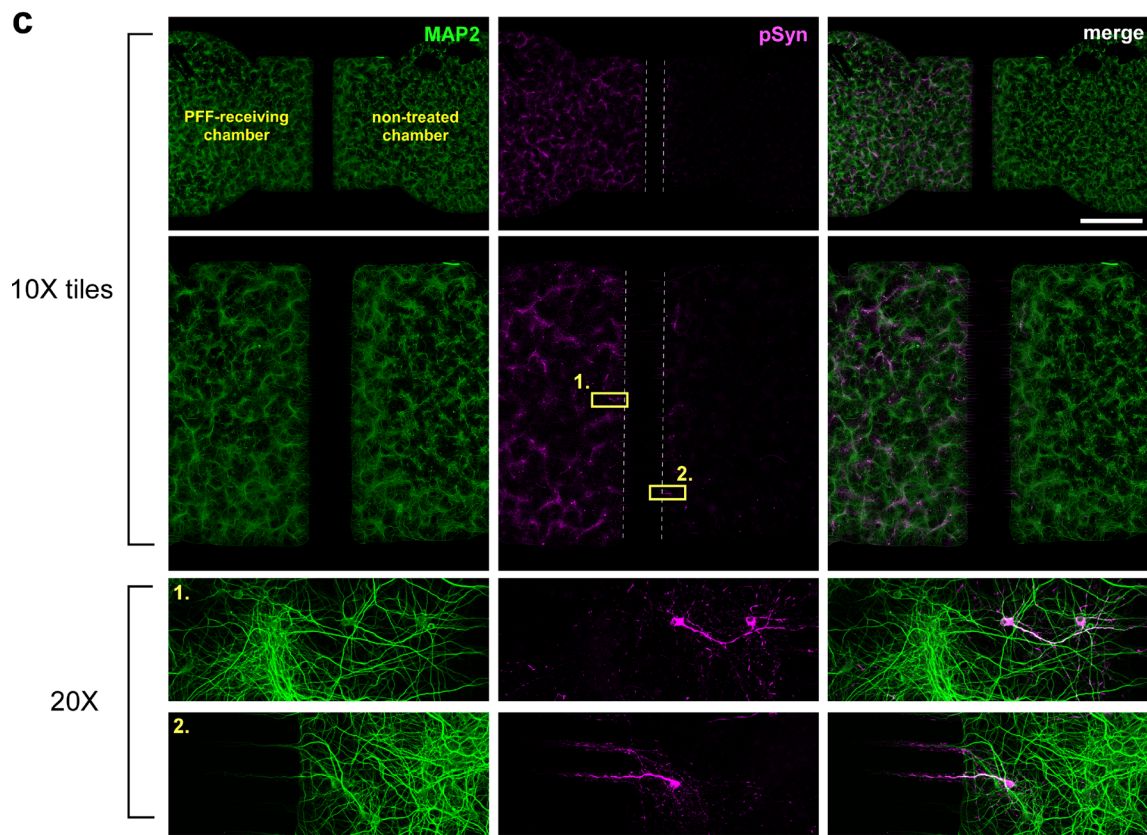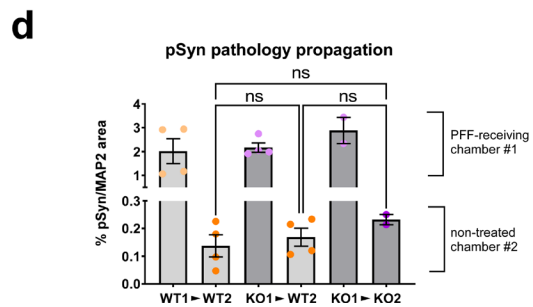

**Supplementary Fig. 6: Loss of USP19 does not affect neuron-to-neuron propagation of pSyn pathology**

**a.** Scheme of a microfluidic device (Omega, Enuvio) composed of two neuronal chambers connected by axonal microchannels. Micrographs show good experimental conditions needed to study cell-to-cell propagation where axons of neurons in chamber #1 transduced to express GFP successfully reach to and branch out in chamber #2. Scale bar= 50 $\mu$ m. **b.** Scheme of cell-to-cell propagation experiment. **c.** Micrographs of the cell-to-cell propagation experiment. Whole chamber tile images were acquired at 10X using confocal microscope. Scale bar= 2mm. Insets at 20X show that neurons in both chambers #1 and #2 look healthy and develop pSyn<sup>+</sup> inclusions. **d.** Quantification of pSyn pathology in PFF-receiving and opposed chambers in WT to WT, WT to KO and KO to KO conditions. n= 2-4 independent cultures. One-way ANOVA was used for statistical analysis followed by Tukey's multiple comparisons test. Data are mean  $\pm$ s.e.m.

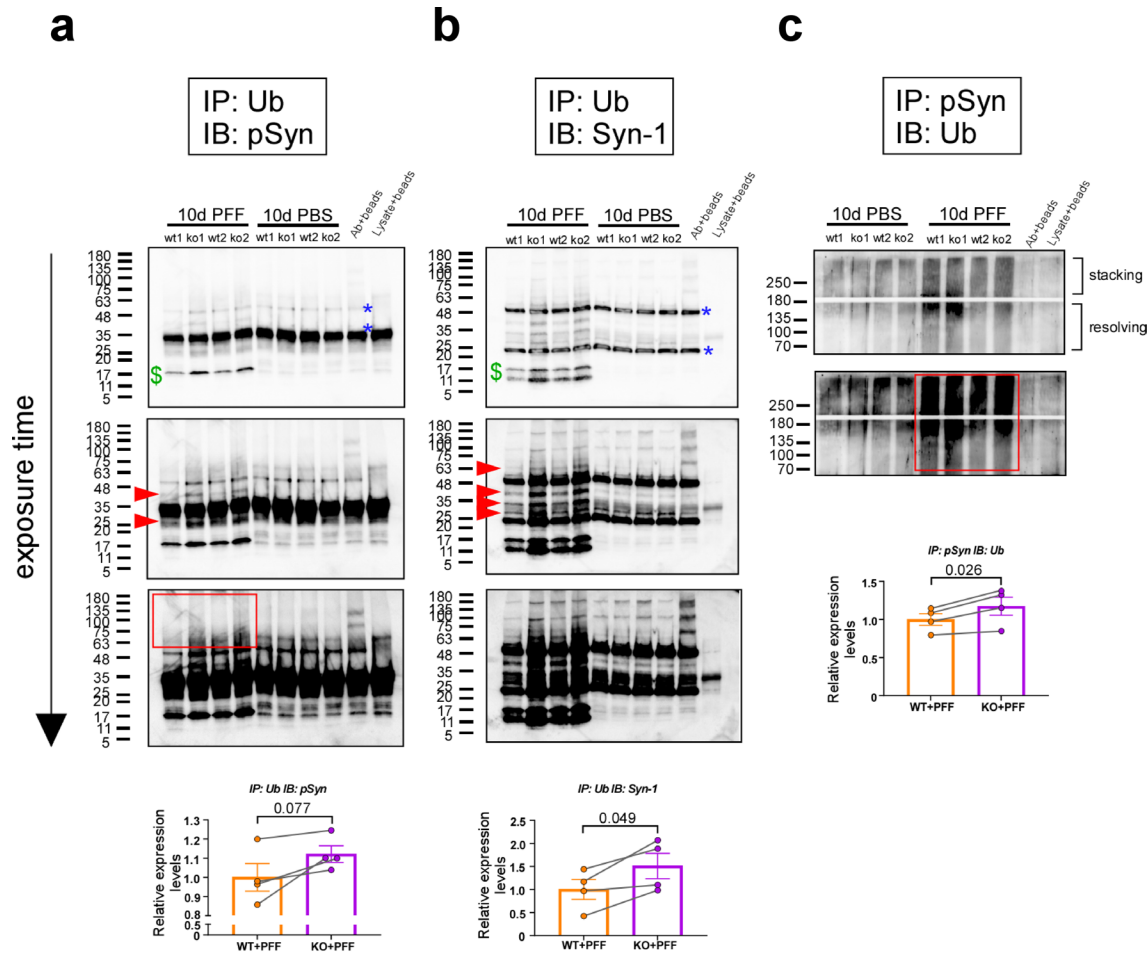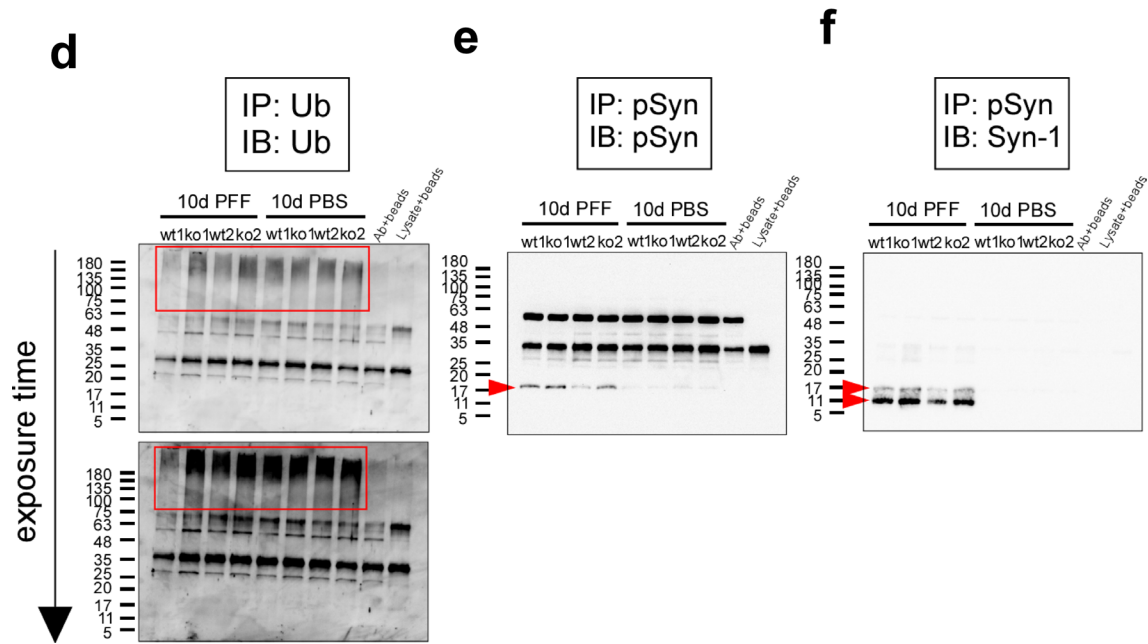

**Supplementary Fig. 7: Loss of USP19 enhances ubiquitination of  $\alpha$ -syn in primary cortical neurons.** Immunoprecipitation (non-denaturing conditions) of ubiquitinated proteins from WT and KO neurons at 10dpt using anti-Ub antibody. IP samples (40% of total) were blotted for pSyn (**a**) and total  $\alpha$ -syn (Syn-1, **b**). Graphs show whole lane quantification of PFF treated IP samples. Dollar symbols point to monomeric bands at the expected size of monomeric pSyn and  $\alpha$ -syn. These mostly likely represent species associated with ubiquitinated forms of pSyn or  $\alpha$ -syn under these non-denaturing conditions. Arrowheads points to other specific Ub-pSyn and Ub-  $\alpha$ -syn bands. Red rectangle shows high M.W. species. Blue asterisks point to heavy and light immunoglobulin chains. **c.** Reverse immunoprecipitation using anti-pSyn antibody. Both stacking and resolving gels were transferred and blotted for the presence of Ub-pSyn. Graph shows the quantification of high M.W. Ub-pSyn of PFF treated samples. n= 4 biologically independent cultures. Paired t-test was used for statistical analysis. Data are means  $\pm$ s.e.m.. P-values are indicated. **d-f.** Immunoblot images show successful immunoprecipitation of ubiquitinated proteins and pSyn from WT and KO neurons at 10dpt using anti-Ub and anti-pSyn antibodies, respectively. IP samples (10% of total) were blotted for Ub (**d**), pSyn (**e**) and total  $\alpha$ -syn (Syn-1) (**f**). Rectangles show high M.W. Ub-proteins. Arrowheads point to pulled down pSyn and  $\alpha$ -syn.

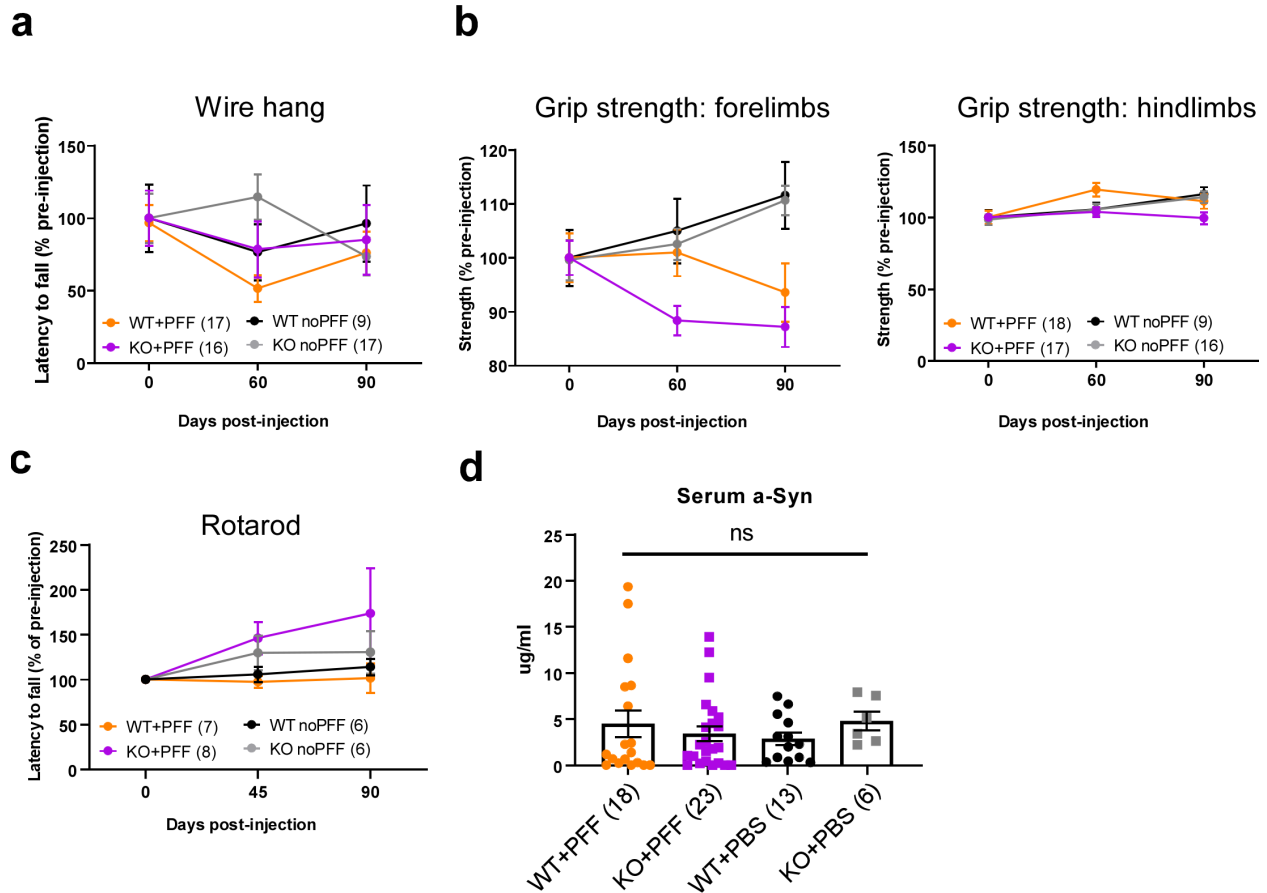

**Supplementary Fig. 8: Behavioral analyses and a-syn serum levels in USP19 WT and KO mice.**

All behavioral tests were performed at three time points: pre-PFF, 1.5-2 and 3-months post-PFF. Non-injected age-matched animals were used as controls. Number of biologically independent animals are indicated in brackets. **a.** Wire-hang (latency to fall). **b.** Grip strength in forelimbs and hindlimbs. **c.** Rotarod (latency to fall). Data are mean  $\pm$  s.e.m. Two-way ANOVA with Tukey's multiple comparison test was used for statistical analysis. **d.** Graph shows quantification of a-syn levels in serum at end-point (90-120 dpi) and age-matched PBS-injected controls. Data are mean  $\pm$  s.e.m. One-way ANOVA with Tukey's multiple comparison test was used for statistical analysis.

## **Supplementary methods**

### *Wire hang*

The wire hang test of motor function was conducted using a modified protocol previously described (1). A mouse was placed on the top of a standard wire cage lid. The lid was lightly shaken to cause the mouse to grip to the wires and then turned upside down onto a 40 cm tall empty box. The latency to fall off the wire grid was measured. A trial was stopped if a mouse remained on the lid longer than 15 min. Three different time points (pre-injection, 60 and 90 dpi) were assessed. The animals were not subjected to prior habituation.

### *Grip strength*

Forelimbs and hindlimb strength were measured using a Grip Strength Meter (Columbus Instruments, Columbus, OH, USA). Habituation (4 trials per each leg pair) to the apparatus was performed one day before the test. Average of 4 consecutive trials was used for analysis on the test day. Three different time points (pre-injection, 60 and 90 dpi) were assessed.

### *Rota-Rod*

To assess motor learning, coordination, and balance, mice were subjected to the Rota-Rod test (Stoelting Co., Ugo Basile) as previously done in (1) with minor modifications. Briefly, each mouse was given a training session (three 5-min trials, 5 min apart) to acclimate them to the apparatus. During the test period (2 hr later), each mouse was placed on the rotarod with increasing speed, from 4 rpm to 40 rpm for the period of 5 min. The latency to fall off the rotarod was recorded. Each mouse received two consecutive trials and the mean latency to fall was used for analysis. Three different time points (pre-injection, 45 and 90 dpi) were assessed.

### *Measurement a-syn in mouse serum*

End-point blood collection was performed via cardiac puncture. Blood was let to coagulate for 15 min at room temperature. The clot was removed by centrifugation at 2000x g for 10 min. Serum supernatant was collected and stored at -80°C. Total human aSyn quantification by ELISA was performed using the Human alpha-Synuclein ELISA Kit (Thermo Fisher #KHB0061) following the manufacturer's protocol.

1. Luk KC, Kehm V, Carroll J, Zhang B, O'Brien P, Trojanowski JQ, et al. Pathological alpha-synuclein transmission initiates Parkinson-like neurodegeneration in nontransgenic mice. *Science*. 2012;338(6109):949-53.

Western Blotting – uncropped blots

Figure 1

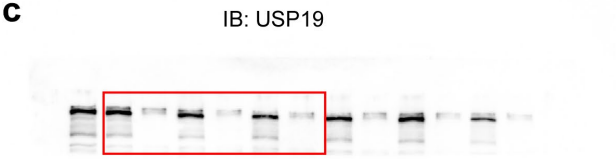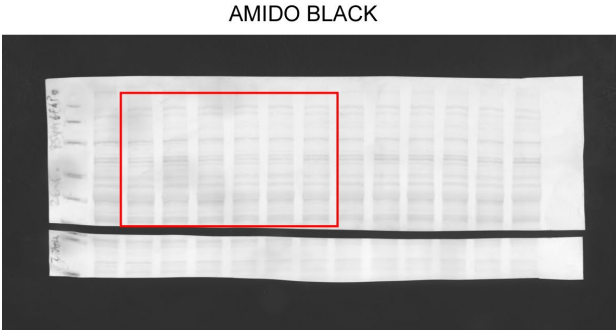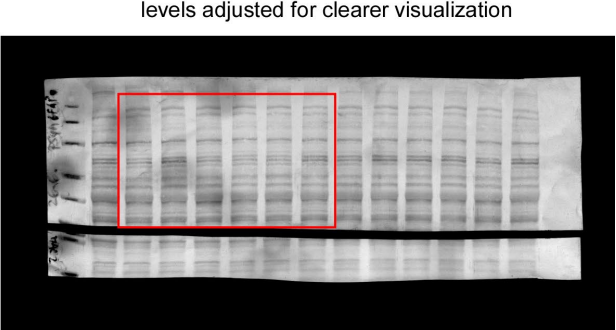



**Figure 2**

**g**

IB: pSyn short exp

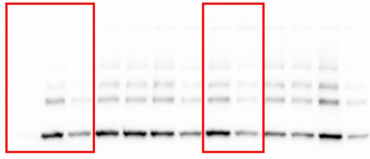

IB: pSyn long exp

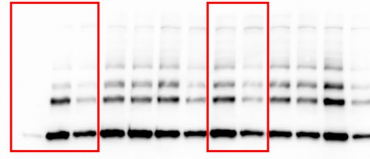

IB: Syn-1 short exp

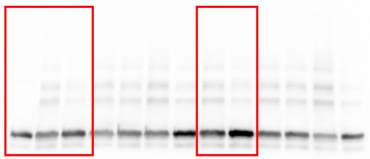

IB: Syn-1 long exp

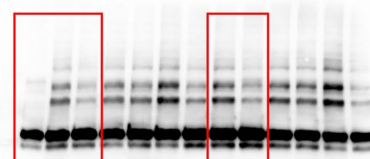

AMIDO BLACK

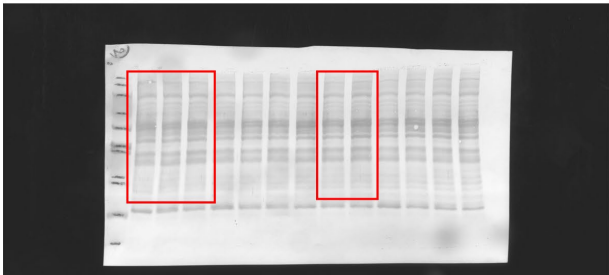

levels adjust for clearer visualization

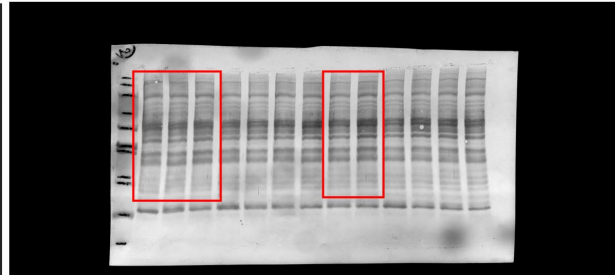

**i**

IB: pTAU

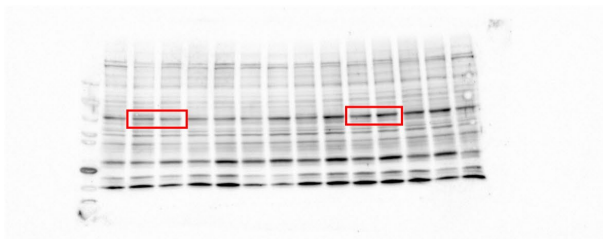

IB: TAU-5

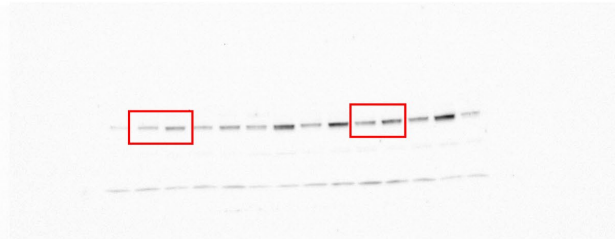

AMIDO BLACK

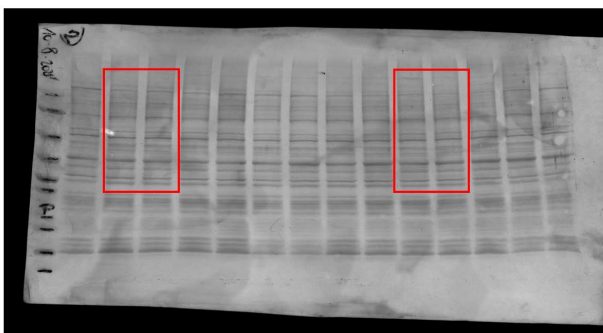

**Figure 3**

**e**

IB: GFAP

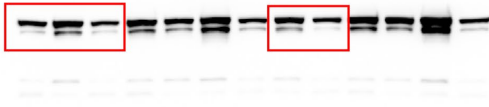

AMIDO BLACK

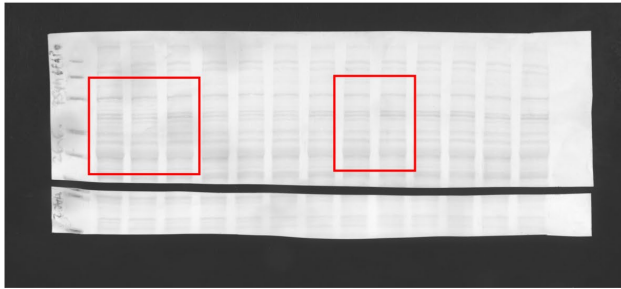

levels adjusted for better visualization

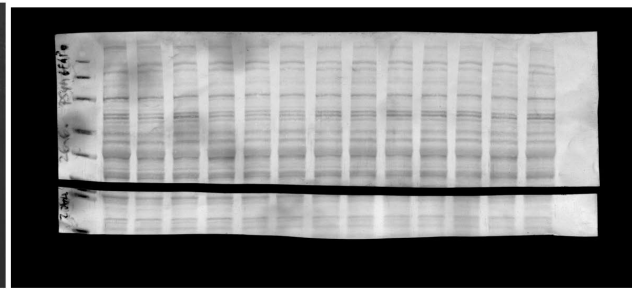

IB: b-actin

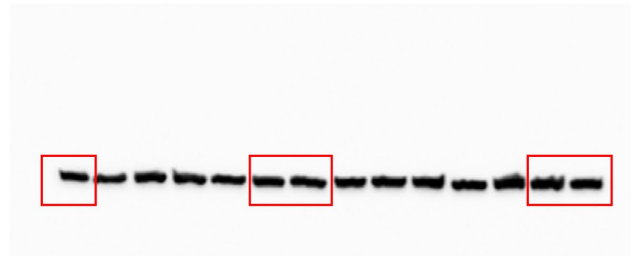

IB: Iba-1

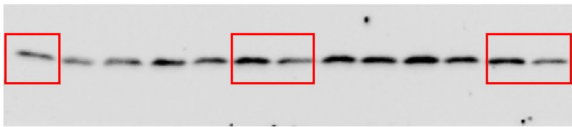

Figure 4

a

IB: Synaptotagmin-1

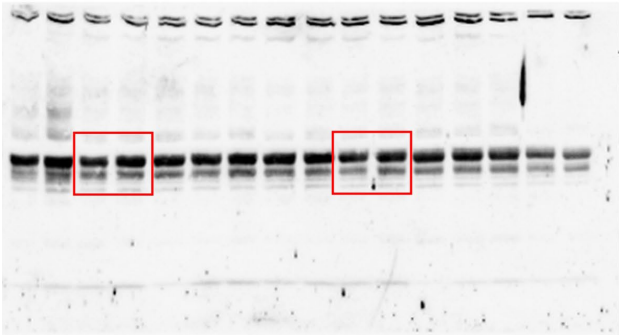

IB: b-actin

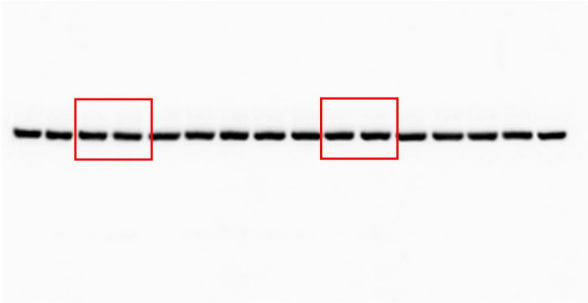

IB: TH

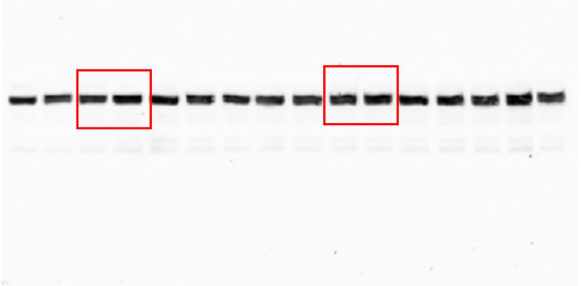

IB: SNAP25

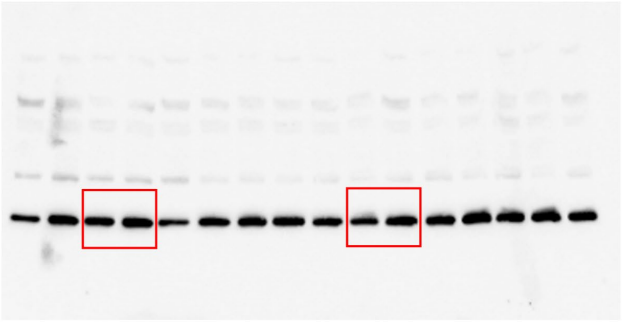

Figure 5

d

IB: pSyn

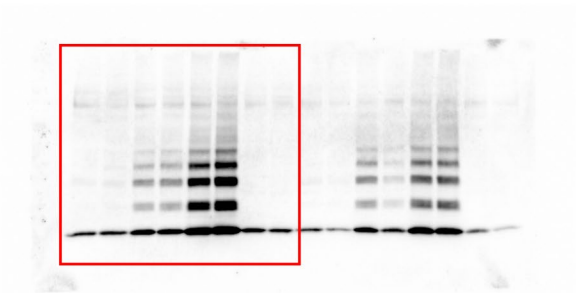

IB: actin

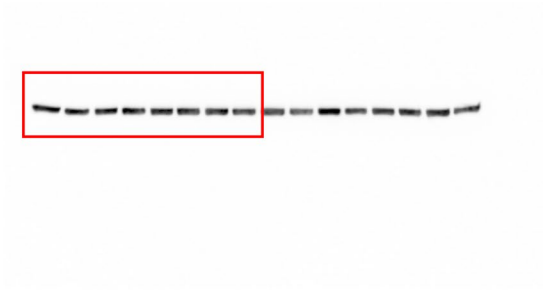

IB:USP19

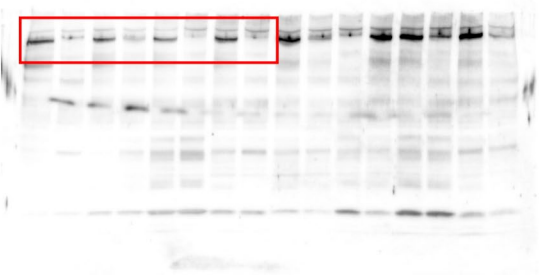

Figure 6

d

IP - pSyn  
IB - pSyn short exp

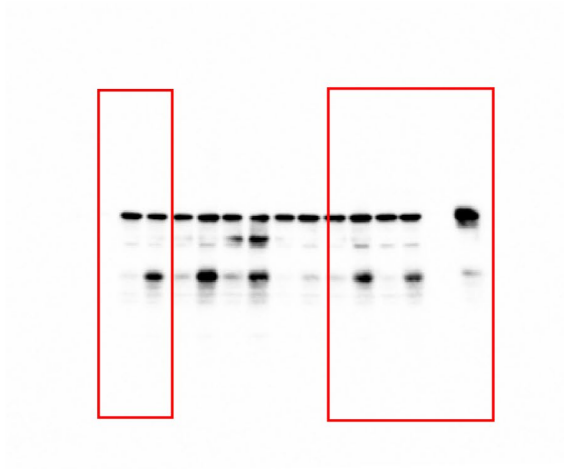

IP - pSyn  
IB - pSyn long exp

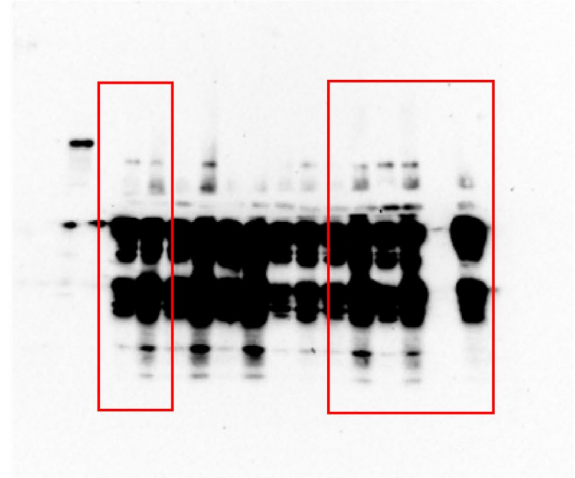

IP - pSyn  
IB - Ub

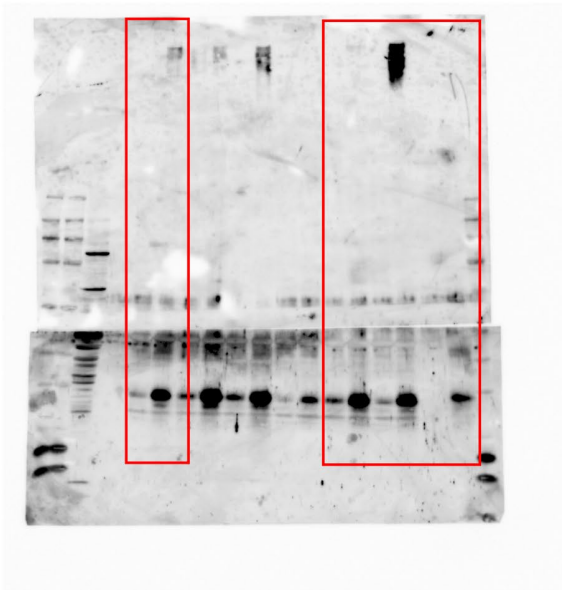

Supplementary figure 2

d, e

IB: pSyn

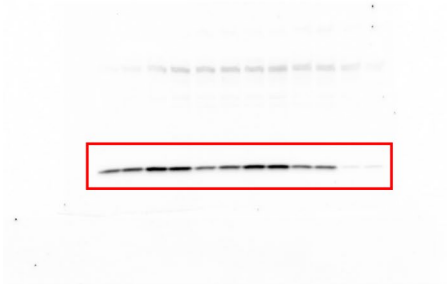

IB: Syn-1

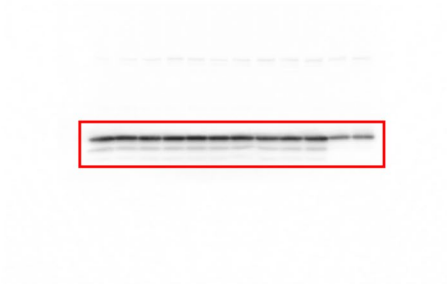

IB: b-actin

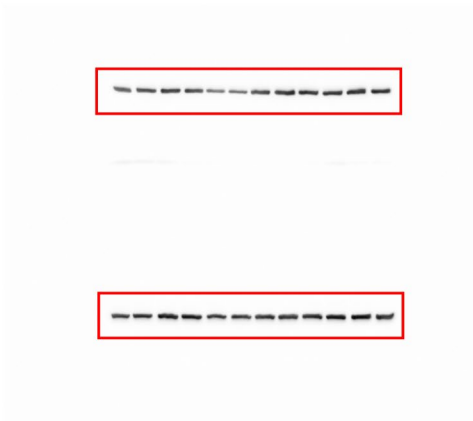

**Supplementary figure 7**

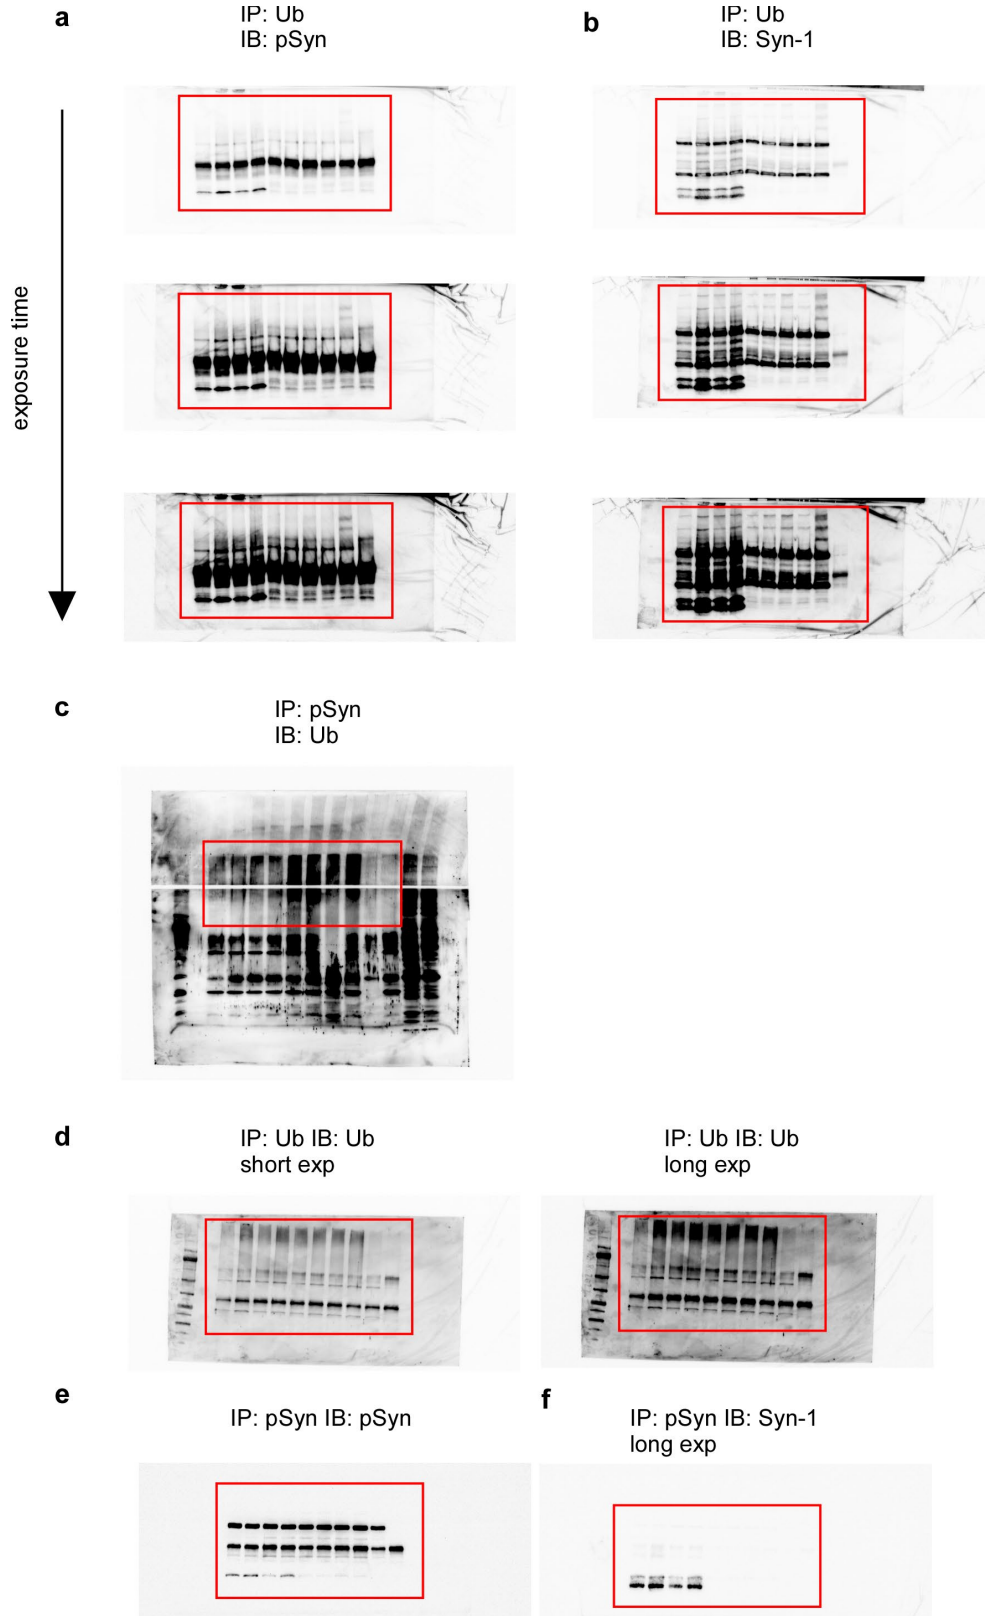

Supplement: 41531_2023_601_MOESM1_ESM.pdf [file 41531_2023_601_MOESM1_ESM.pdf]
